# Supplementary material
Source: MDPI journal article supplement (https://www.mdpi.com/1999-4907/15/4/621)
Supplement: s1 [file s1]

Archive with 1 entries (1 files):
- forests-2779071-supplementary.pdf
